# Supplementary material
Source: PubMed Central journal article supplement (PMC9359003)
Supplement: NIHMS1818332-supplement-supplementary_tables.pdf [file NIHMS1818332-supplement-supplementary_tables.pdf]

**SUPPLEMENTAL TABLES**

**Table S1. Types of vaping devices used most often<sup>1</sup> among past 30-day vapers, weighted %(n)**

|                                  | <b>2017</b> | <b>2018</b> | <b>2019</b> | <b>2019 vs. 2017</b>                 |
|----------------------------------|-------------|-------------|-------------|--------------------------------------|
|                                  | % (n)       | % (n)       | % (n)       | AOR (95%CI), p value <sup>2</sup>    |
| <b>Canada</b>                    | (n=340)     | (n=463)     | (n=738)     |                                      |
| Disposable                       | 10.0% (34)  | 7.9% (36)   | 6.5% (48)   | 0.66 (0.39-1.12), p=0.12             |
| Cartridge/pod                    | 14.9% (51)  | 19.2% (88)  | 47.6% (351) | <b>5.19 (3.53-7.63), p&lt;0.0001</b> |
| Refillable tank                  | 66.2% (225) | 71.9% (328) | 52.3% (385) | <b>0.53 (0.39-0.72), p&lt;0.0001</b> |
| Don't know/Refused               | 2.3% (8)*   | 1.0% (5)*   | 1.6% (12)   | --                                   |
| More than 1 product <sup>3</sup> | 2.3% (8)*   | N/A         | 8.8% (65)   | --                                   |
| <b>England</b>                   | (n=347)     | (n=351)     | (n=439)     |                                      |
| Disposable                       | 8.5% (30)   | 11.4% (39)  | 12.1% (53)  | 1.51 (0.91-2.50), p=0.11             |
| Cartridge/pod                    | 27.8% (96)  | 18.4% (63)  | 27.7% (122) | 1.01 (0.72-1.42), p=0.97             |
| Refillable tank                  | 58.5% (203) | 68.5% (236) | 69.1% (304) | <b>1.60 (1.16-2.21), p=0.004</b>     |
| Don't know/Refused               | 1.8% (6)*   | 1.6% (6)*   | 1.7% (7)*   | --                                   |
| More than 1 product <sup>3</sup> | 2.8% (10)*  | N/A         | 9.3% (41)   | --                                   |
| <b>US</b>                        | (n=454)     | (n=635)     | (n=736)     |                                      |
| Disposable                       | 14.4% (66)  | 12.8% (81)  | 12.9% (95)  | 0.90 (0.60-1.34), p=0.60             |
| Cartridge/pod                    | 34.5% (157) | 42.9% (271) | 58.0% (427) | <b>2.66 (2.01-3.50), p&lt;0.0001</b> |
| Refillable tank                  | 53.8% (244) | 43.6% (275) | 41.4% (305) | <b>0.60 (0.46-0.79), p=0.0002</b>    |
| Don't know/Refused               | 0.9% (4)*   | 0.7% (4)*   | 1.0% (7)*   | --                                   |
| More than 1 product <sup>3</sup> | 5.4% (25)   | N/A         | 11.9% (87)  | --                                   |

<sup>1</sup>Device type used “most often” inferred for respondents who only ever used one type (those who used more than one type were asked which they used most often).

<sup>2</sup>From separate logistic regression models for each device type, stratified by country, adjusted for age group, sex, and race/ethnicity (white only vs. not)

<sup>3</sup>Respondents could select more than one response in 2017 and 2019; row percentages within country may not add to 100. Each device type was analyzed separately, so those who selected more than one type are included in more than one group.

\*High variability (coefficient of variation is > 33.3 or the numerator is <10), interpret with caution

**Table S2: Reasons for using current brand instead of other e-cigarette/vaping brands, among past 30-day vapers who selected a usual brand, 2019, by country and usual brand, weighted %(n)**

| REASON <sup>1</sup>         | Canada                       |                 |                                          |                               | England                     |                |                                         |                               | US                           |                 |                                          |                               |
|-----------------------------|------------------------------|-----------------|------------------------------------------|-------------------------------|-----------------------------|----------------|-----------------------------------------|-------------------------------|------------------------------|-----------------|------------------------------------------|-------------------------------|
|                             | Total<br>(n=599)             | JUUL<br>(n=168) | Nicotine<br>salt <sup>2</sup><br>(n=153) | Other <sup>3</sup><br>(n=280) | Total<br>(n=317)            | JUUL<br>(n=61) | Nicotine<br>salt <sup>2</sup><br>(n=43) | Other <sup>3</sup><br>(n=213) | Total<br>(n=661)             | JUUL<br>(n=325) | Nicotine<br>salt <sup>2</sup><br>(n=106) | Other <sup>3</sup><br>(n=230) |
| More popular among friends  | <b>31.6%</b><br><b>(189)</b> | 34.5 (58)       | 40.1 (61)                                | 25.1 (70)                     | <b>23.9%</b><br><b>(76)</b> | 29.5 (18)      | 25.0 (11)                               | 22.1 (47)                     | <b>27.0%</b><br><b>(179)</b> | 35.2 (114)      | 17.0 (18)                                | 20.0 (46)                     |
| Easier to use               | <b>27.1%</b><br><b>(163)</b> | 23.2 (39)       | 34.0 (52)                                | 25.8 (72)                     | <b>26.4%</b><br><b>(84)</b> | 34.4 (21)      | 43.2 (19)                               | 20.7 (44)                     | <b>30.7%</b><br><b>(203)</b> | 33.2 (108)      | 34.6 (37)                                | 25.3 (58)                     |
| Better flavor / taste       | <b>26.3%</b><br><b>(158)</b> | 24.4 (41)       | 31.6 (48)                                | 24.4 (68)                     | <b>30.8%</b><br><b>(98)</b> | 36.1 (22)      | 40.9 (18)                               | 27.2 (58)                     | <b>34.2%</b><br><b>(226)</b> | 36.4 (118)      | 36.4 (39)                                | 30.0 (69)                     |
| Better looking              | <b>24.3%</b><br><b>(146)</b> | 19.0 (32)       | 28.9 (44)                                | 25.1 (70)                     | <b>22.7%</b><br><b>(72)</b> | 34.4 (21)      | 34.9 (15)                               | 17.0 (36)                     | <b>18.0%</b><br><b>(119)</b> | 16.3 (53)       | 28.0 (30)                                | 15.7 (36)                     |
| I was offered it            | <b>23.8%</b><br><b>(143)</b> | 30.4 (51)       | 13.2 (20)                                | 25.7 (72)                     | <b>20.9%</b><br><b>(66)</b> | 36.1 (22)      | 18.2 (8)*                               | 17.4 (37)                     | <b>23.7%</b><br><b>(157)</b> | 25.2 (82)       | 23.4 (25)                                | 21.7 (50)                     |
| Smoother to inhale          | <b>22.9%</b><br><b>(137)</b> | 19.2 (32)       | 27.0 (41)                                | 22.6 (63)                     | <b>21.8%</b><br><b>(69)</b> | 19.7 (12)      | 43.2 (19)                               | 18.3 (39)                     | <b>25.5%</b><br><b>(168)</b> | 21.3 (69)       | 43.4 (46)                                | 23.0 (53)                     |
| Less expensive              | <b>21.9%</b><br><b>(131)</b> | 11.3 (19)       | 32.2 (49)                                | 22.6 (63)                     | <b>20.7%</b><br><b>(66)</b> | 6.6 (4)*       | 16.3 (7)*                               | 25.4 (54)                     | <b>19.7%</b><br><b>(130)</b> | 11.7 (38)       | 33.6 (36)                                | 24.8 (57)                     |
| Easier to hide              | <b>20.3%</b><br><b>(121)</b> | 25.0 (42)       | 24.3 (37)                                | 15.1 (42)                     | <b>12.2%</b><br><b>(39)</b> | 18.0 (11)      | 9.3 (4)*                                | 11.3 (24)                     | <b>22.8%</b><br><b>(150)</b> | 25.8 (84)       | 24.5 (26)                                | 17.5 (40)                     |
| Easier to get               | <b>19.5%</b><br><b>(117)</b> | 25.6 (43)       | 19.1 (29)                                | 16.1 (45)                     | <b>20.7%</b><br><b>(66)</b> | 13.1 (8)*      | 15.9 (7)*                               | 23.9 (51)                     | <b>20.1%</b><br><b>(133)</b> | 18.8 (61)       | 23.4 (25)                                | 20.5 (47)                     |
| Stronger nicotine 'hit'     | <b>17.3%</b><br><b>(103)</b> | 16.1 (27)       | 35.9 (55)                                | 7.9 (22)                      | <b>9.3%</b><br><b>(29)</b>  | 11.5 (7)*      | 22.7 (10)                               | 6.1 (13)                      | <b>17.9%</b><br><b>(119)</b> | 16.3 (53)       | 37.7 (40)                                | 11.3 (26)                     |
| More fun                    | <b>16.5%</b><br><b>(99)</b>  | 17.9 (30)       | 17.8 (27)                                | 15.1 (42)                     | <b>16.5%</b><br><b>(52)</b> | 21.3 (13)      | 27.9 (12)                               | 12.7 (27)                     | <b>16.8%</b><br><b>(111)</b> | 17.2 (56)       | 19.6 (21)                                | 14.8 (34)                     |
| Less harmful                | <b>11.3%</b><br><b>(67)</b>  | 8.3 (14)        | 9.2 (14)                                 | 14.0 (39)                     | <b>15.7%</b><br><b>(50)</b> | 27.9 (17)      | 20.5 (9)*                               | 11.7 (25)                     | <b>11.6%</b><br><b>(76)</b>  | 13.6 (44)       | 12.3 (13)                                | 8.3 (19)                      |
| Better for quitting smoking | <b>10.4%</b><br><b>(62)</b>  | 10.1 (17)       | 13.1 (20)                                | 9.3 (26)                      | <b>13.3%</b><br><b>(42)</b> | 14.8 (9)*      | 25.6 (11)                               | 10.3 (22)                     | <b>8.7%</b><br><b>(58)</b>   | 9.8 (32)        | 12.3 (13)                                | 5.7 (13)                      |
| Other reason(s)             | <b>2.3%</b><br><b>(14)</b>   | 1.2 (2)*        | 3.9 (6)*                                 | 1.8 (5)*                      | <b>1.8%</b><br><b>(6)*</b>  | 0              | 0                                       | 2.8 (6)*                      | <b>2.5%</b><br><b>(17)</b>   | 0.6 (2)*        | 4.7 (5)*                                 | 4.4 (10)*                     |

<sup>1</sup>Percentages do not add to 100, as respondents could choose multiple responses (mean=2.7)

<sup>2</sup>Specified they currently used nicotine salts, but selected a brand other than JUUL

<sup>3</sup>Specified they did not currently use nicotine salts and selected a brand other than JUUL

\*High variability (coefficient of variation is > 33.3 or the numerator is <10), interpret with caution

**Table S3. Patterns of use and symptoms of dependence among past 30-day vapers, by self-reported current nicotine use, 2019, weighted %(n)**

|                                                     | <b>Currently NOT using nicotine<sup>1</sup></b><br>(n=645) | <b>Currently use nicotine (not salts)<sup>2</sup></b><br>(n=831) | <b>Currently use nicotine salts<sup>3</sup></b><br>(n=414) | <b>Nicotine (non-salt) vs no nicotine</b> | <b>Nicotine salts vs no nicotine</b>   |
|-----------------------------------------------------|------------------------------------------------------------|------------------------------------------------------------------|------------------------------------------------------------|-------------------------------------------|----------------------------------------|
|                                                     | % (n)                                                      | % (n)                                                            | % (n)                                                      | AOR (95%CI),<br>p value <sup>4</sup>      | AOR (95%CI),<br>p value <sup>4</sup>   |
| <b>Smoking status<sup>5</sup></b>                   |                                                            |                                                                  |                                                            |                                           |                                        |
| <i>Current smoker</i>                               | 9.5 (62)                                                   | 19.2 (160)                                                       | 15.6 (65)                                                  | <b>2.50 (1.84-3.41)</b><br>p<0.0001       | <b>2.06 (1.42-2.99)</b><br>p=0.0001    |
| Experimental smoker                                 | 53.6 (346)                                                 | 58.1 (483)                                                       | 58.1 (241)                                                 |                                           |                                        |
| Former smoker                                       | 1.5 (9)                                                    | 5.2 (43)                                                         | 8.0 (33)                                                   |                                           |                                        |
| Never smoker                                        | 35.4 (228)                                                 | 17.4 (145)                                                       | 18.2 (76)                                                  |                                           |                                        |
| <b>Days ever vaped<sup>6</sup></b>                  |                                                            |                                                                  |                                                            |                                           |                                        |
| <i>100 days or more</i>                             | 10.5 (68)                                                  | 40.1 (335)                                                       | 60.2 (250)                                                 | <b>5.27 (3.85-7.20)</b><br>p<0.0001       | <b>11.59 (8.14-16.50)</b><br>p<0.0001  |
| 51 to 99 days                                       | 7.4 (48)                                                   | 11.6 (97)                                                        | 7.6 (31)                                                   |                                           |                                        |
| 21 to 50 days                                       | 13.6 (88)                                                  | 17.8 (148)                                                       | 7.8 (32)                                                   |                                           |                                        |
| 11 to 20 days                                       | 14.1 (91)                                                  | 10.2 (85)                                                        | 8.9 (37)                                                   |                                           |                                        |
| 2 to 10 days                                        | 33.5 (216)                                                 | 13.9 (116)                                                       | 8.8 (36)                                                   |                                           |                                        |
| One day                                             | 16.5 (107)                                                 | 3.0 (25)                                                         | 3.7 (15)                                                   |                                           |                                        |
| Don't know                                          | 4.4 (29)                                                   | 3.4 (28)                                                         | 3.0 (12)                                                   |                                           |                                        |
| <b>Mean days vaped in past 30d<sup>7</sup> (SD)</b> | 6.4 (7.4)                                                  | 15.2 (10.4)                                                      | 20.5 (9.9)                                                 | <b>B=8.45 (7.27-9.62)</b> p<0.0001        | <b>B=13.47 (12.01-14.94)</b> p<0.0001  |
| <b>Times vaped/day in past 30d<sup>8</sup></b>      |                                                            |                                                                  |                                                            |                                           |                                        |
| <i>More than 20 times per day</i>                   | 3.0 (19)                                                   | 15.1 (126)                                                       | 36.3 (151)                                                 | <b>5.35 (3.39-8.44)</b><br>p<0.0001       | <b>17.51 (10.94-28.01)</b><br>p<0.0001 |
| 11 to 20 times per day                              | 4.4 (28)                                                   | 11.0 (92)                                                        | 10.4 (43)                                                  |                                           |                                        |
| 6 to 10 times per day                               | 11.6 (74)                                                  | 18.0 (150)                                                       | 17.9 (74)                                                  |                                           |                                        |
| 2 to 5 times per day                                | 37.8 (243)                                                 | 37.4 (312)                                                       | 20.5 (85)                                                  |                                           |                                        |
| 1 time per day                                      | 37.7 (242)                                                 | 15.9 (133)                                                       | 11.5 (48)                                                  |                                           |                                        |
| Don't know                                          | 5.6 (46)                                                   | 2.5 (21)                                                         | 3.4 (14)                                                   |                                           |                                        |
| <b>Urges to vape<sup>9</sup></b>                    |                                                            |                                                                  |                                                            |                                           |                                        |
| <i>Several times a day</i>                          | 7.0 (45)                                                   | 18.2 (152)                                                       | 34.3 (141)                                                 | <b>3.12 (2.37-4.12)</b><br>p<0.0001       | <b>7.67 (5.50-10.71)</b><br>p<0.0001   |
| <i>Every day or most days</i>                       | 11.2 (72)                                                  | 23.1 (192)                                                       | 28.2 (116)                                                 |                                           |                                        |
| At least once a week                                | 16.6 (107)                                                 | 21.8 (182)                                                       | 19.2 (79)                                                  |                                           |                                        |
| Less than once a week                               | 14.8 (95)                                                  | 13.4 (112)                                                       | 5.0 (21)                                                   |                                           |                                        |
| Never                                               | 47.2 (304)                                                 | 21.2 (176)                                                       | 11.3 (46)                                                  |                                           |                                        |
| Don't know                                          | 3.2 (20)                                                   | 2.3 (20)                                                         | 2.1 (9)                                                    |                                           |                                        |
| <b>Perceived addiction<sup>10</sup></b>             |                                                            |                                                                  |                                                            |                                           |                                        |
| <i>Yes, very addicted</i>                           | 5.1 (33)                                                   | 10.1 (84)                                                        | 26.4 (109)                                                 | <b>2.85 (2.22-3.64)</b><br>p<0.0001       | <b>8.23 (5.90-11.48)</b><br>p<0.0001   |
| <i>Yes, a little addicted</i>                       | 20.9 (135)                                                 | 40.0 (334)                                                       | 47.5 (196)                                                 |                                           |                                        |
| Not at all                                          | 71.1 (458)                                                 | 46.8 (390)                                                       | 23.6 (97)                                                  |                                           |                                        |
| Don't know                                          | 2.8 (21)                                                   | 3.1 (26)                                                         | 2.5 (10)                                                   |                                           |                                        |

Note: Weighted n's are rounded

<sup>1</sup>Specified they did not currently use nicotine

<sup>2</sup>Specified they currently used nicotine, but not nicotine salts

<sup>3</sup>Specified they currently used nicotine salts

<sup>4</sup>From separate logistic regression models for each use outcome (linear regression model for mean days), adjusted for country, age group, sex, and race/ethnicity (white only vs. not); outcomes analyzed as heavy use category vs else

<sup>5</sup>Analyzed as current smoker vs else

<sup>6</sup>Analyzed as "100 days or more" vs else, refusals (n=1) and don't know responses excluded

<sup>7</sup>Analyzed as a continuous outcome variable, refusals (n=9) and don't know responses (n=299) excluded

<sup>8</sup>Analyzed as "More than 20 times per day" vs else, refusals (n=6) and don't know responses excluded

<sup>9</sup>Analyzed as "Several times a day"/"Every day or most days" vs else, refusals (n=9) and don't know responses excluded

<sup>10</sup>Analyzed as "Yes, very addicted"/"Yes, a little addicted" vs "Not at all", refusals (n=8) and don't know responses excluded

\*High variability (coefficient of variation is > 33.3 or the numerator is <10), interpret with caution

**Table S4. Patterns of use and symptoms of dependence among past 30-day vapers, by current use of JUUL and nicotine salts, 2019**

|                                                     | Currently NOT using nicotine salts or JUUL <sup>1</sup> (n=1043) | Currently use JUUL (n=554) | Currently use nicotine salts (other than JUUL) <sup>2</sup> (n=316) | JUUL vs not nicotine salts or JUUL | Nicotine salts vs not nicotine salts or JUUL |
|-----------------------------------------------------|------------------------------------------------------------------|----------------------------|---------------------------------------------------------------------|------------------------------------|----------------------------------------------|
|                                                     | % (n)                                                            | % (n)                      | % (n)                                                               | AOR (95%CI), p value <sup>3</sup>  | AOR (95%CI), p value <sup>3</sup>            |
| <b>Smoking status<sup>4</sup></b>                   |                                                                  |                            |                                                                     |                                    |                                              |
| <i>Current smoker</i>                               | 16.8 (175)                                                       | 11.7 (64)                  | 16.2 (51)                                                           | 0.80 (0.58-1.09)                   | 1.04 (0.74-1.46)                             |
| Experimental smoker                                 | 54.6 (567)                                                       | 58.4 (323)                 | 58.1 (183)                                                          | p=0.16                             | p=0.83                                       |
| Former smoker                                       | 3.6 (38)                                                         | 4.0 (22)                   | 8.5 (27)                                                            |                                    |                                              |
| Never smoker                                        | 24.9 (259)                                                       | 25.9 (143)                 | 17.2 (54)                                                           |                                    |                                              |
| <b>Days ever vaped<sup>5</sup></b>                  |                                                                  |                            |                                                                     |                                    |                                              |
| <i>100 days or more</i>                             | 25.3 (264)                                                       | 34.9 (193)                 | 61.9 (196)                                                          | 1.26 (0.97-1.63)                   | <b>4.19 (3.11-5.64)</b>                      |
| 51 to 99 days                                       | 10.0 (104)                                                       | 9.9 (55)                   | 6.3 (20)                                                            | p=0.089                            | <b>p&lt;0.0001</b>                           |
| 21 to 50 days                                       | 15.1 (158)                                                       | 15.6 (86)                  | 8.1 (26)                                                            |                                    |                                              |
| 11 to 20 days                                       | 11.5 (120)                                                       | 12.3 (68)                  | 8.7 (27)                                                            |                                    |                                              |
| 2 to 10 days                                        | 23.2 (242)                                                       | 19.5 (108)                 | 8.1 (26)                                                            |                                    |                                              |
| One day                                             | 9.8 (102)                                                        | 6.1 (33)                   | 4.2 (13)                                                            |                                    |                                              |
| Don't know                                          | 5.1 (53)                                                         | 1.7 (9)*                   | 2.7 (9)*                                                            |                                    |                                              |
| <b>Mean days vaped in past 30d<sup>6</sup> (SD)</b> | 11.1 (10.1)                                                      | 13.7 (10.6)                | 20.4 (9.8)                                                          | <b>B=1.58 (0.11-3.04) p=0.035</b>  | <b>B=8.43 (6.82-10.03) p&lt;0.0001</b>       |
| <b>Times vaped/day in past 30d<sup>7</sup></b>      |                                                                  |                            |                                                                     |                                    |                                              |
| <i>More than 20 times per day</i>                   | 10.0 (104)                                                       | 13.3 (74)                  | 37.4 (118)                                                          | 1.24 (0.86-1.79)                   | <b>4.99 (3.55-7.02)</b>                      |
| 11 to 20 times per day                              | 8.2 (86)                                                         | 8.5 (47)                   | 10.2 (32)                                                           | p=0.24                             | <b>p&lt;0.0001</b>                           |
| 6 to 10 times per day                               | 15.1 (157)                                                       | 15.1 (84)                  | 18.4 (58)                                                           |                                    |                                              |
| 2 to 5 times per day                                | 36.8 (382)                                                       | 37.9 (210)                 | 16.6 (52)                                                           |                                    |                                              |
| 1 time per day                                      | 25.8 (268)                                                       | 21.8 (121)                 | 13.0 (41)                                                           |                                    |                                              |
| Don't know                                          | 4.0 (41)                                                         | 3.4 (19)                   | 4.5 (14)                                                            |                                    |                                              |
| <b>Urges to vape<sup>8</sup></b>                    |                                                                  |                            |                                                                     |                                    |                                              |
| <i>Several times a day</i>                          | 12.5 (129)                                                       | 17.9 (98)                  | 35.5 (112)                                                          | <b>1.47 (1.13-1.91)</b>            | <b>4.14 (3.05-5.61)</b>                      |
| <i>Every day or most days</i>                       | 16.1 (167)                                                       | 23.2 (128)                 | 27.3 (86)                                                           | <b>p=0.0036</b>                    | <b>p&lt;0.0001</b>                           |
| At least once a week                                | 18.2 (189)                                                       | 22.5 (124)                 | 17.9 (56)                                                           |                                    |                                              |
| Less than once a week                               | 14.1 (146)                                                       | 11.7 (65)                  | 5.5 (17)                                                            |                                    |                                              |
| Never                                               | 36.0 (374)                                                       | 22.6 (125)                 | 11.8 (37)                                                           |                                    |                                              |
| Don't know                                          | 3.2 (33)                                                         | 2.1 (11)*                  | 2.0 (6)*                                                            |                                    |                                              |
| <b>Perceived addiction<sup>9</sup></b>              |                                                                  |                            |                                                                     |                                    |                                              |
| <i>Yes, very addicted</i>                           | 7.1 (74)                                                         | 12.5 (69)                  | 26.5 (83)                                                           | <b>1.49 (1.16-1.91)</b>            | <b>5.03 (3.65-6.94)</b>                      |
| <i>Yes, a little addicted</i>                       | 29.7 (309)                                                       | 37.1 (205)                 | 48.6 (153)                                                          | <b>p=0.0017</b>                    | <b>p&lt;0.0001</b>                           |
| Not at all                                          | 59.8 (621)                                                       | 47.8 (264)                 | 22.9 (72)                                                           |                                    |                                              |
| Don't know                                          | 3.4 (35)                                                         | 2.6 (14)                   | 2.0 (6)*                                                            |                                    |                                              |

Note: Weighted n's are rounded

<sup>1</sup>Specified they did not currently use nicotine salts and selected a brand other than JUUL

<sup>2</sup>Specified they currently used nicotine salts, but selected a brand other than JUUL

<sup>3</sup>From separate logistic regression models for each use outcome (linear regression model for mean days), adjusted for country, age group, sex, and race/ethnicity (white only vs. not); outcomes analyzed as heavy use category vs else

<sup>4</sup>Analyzed as current smoker vs else

<sup>5</sup>From responses to the item, "On how many days have you used an e-cigarette/vaped in your entire life?" with response options "One day", "2 to 10 days", "11 to 20 days", "21 to 50 days", "51 to 99 days", "100 days or more"; Analyzed as "100 days or more" vs else, Refusals (n=1) and don't know responses excluded

<sup>6</sup>From responses to the item, "In the past 30 days, on how many days did you use e-cigarettes/vape?"; Analyzed as a continuous outcome variable, refusals (n=9) and don't know responses (n=299) excluded

<sup>7</sup>From responses to the item, "In the past 30 days, on the days you used an e-cigarette/vaped, how many times did you use it each day?" with response options "1 time per day", "2 to 5 times per day", "6 to 10 times per day", "11 to 20 times per day", "More than 20 times per day"; Analyzed as "More than 20 times per day" vs else, Refusals (n=6) and don't know responses excluded

<sup>8</sup>From responses to the item, “In the past 30 days, how often did you have a strong urge to use an e-cigarette/vape?” with response options “Several times a day”, “Every day or most days”, “At least once a week”, “Less than once a week”, “Never”; Analyzed as “Several times a day”/“Every day or most days” vs else, Refusals (n=9) and don’t know responses excluded

<sup>9</sup>From responses to the item, “Do you consider yourself addicted to e-cigarettes/vaping?” with response options “Not at all”, “Yes, a little addicted”, “Yes, very addicted”; Analyzed as “Yes, very addicted”/“Yes, a little addicted” vs “Not at all”, Refusals (n=8) and don’t know responses excluded

\*High variability (coefficient of variation is  $> 33.3$  or the numerator is  $< 10$ ), interpret with caution
